# Supplementary material for: Eastern European and Asian-born populations are prone to gastric cancer: an epidemiologic analysis of foreign-born populations and gastric cancer
Source: PubMed Central journal article supplement — Ann Gastroenterol. 2021 Jun 3;34(5):669–74. doi: 10.20524/aog.2021.0640 (PMC8375647; doi:10.20524/aog.2021.0640), 2021-06-03
Supplement: AnnGastroenterol-34-669_Suppl1.pdf [file AnnGastroenterol-34-669_Suppl1.pdf]

Supplementary material

Supplementary Table 1 Foreign-born population per metropolitan statistical areas

| MSA                                         | Percentage foreign born, by region |        |      |        |         |               |               |               |        |        |        |
|---------------------------------------------|------------------------------------|--------|------|--------|---------|---------------|---------------|---------------|--------|--------|--------|
|                                             | Total                              | Africa | Asia | Europe | Oceania | South America | North America | Asia (other)* | China* | Japan* | Korea* |
| Albuquerque, NM                             | 9.5                                | 0.2    | 1.6  | 0.8    | 0.0     | 0.3           | 0.2           | 1.1           | 0.3    | 0.1    | 0.1    |
| Allentown-Bethlehem-Easton, PA-NJ           | 8.2                                | 0.4    | 2.4  | 1.8    | 0.0     | 1.1           | 0.2           | 1.9           | 0.4    | 0.0    | 0.1    |
| Atlanta-Sandy Springs-Roswell, GA           | 13.8                               | 1.4    | 4.0  | 1.3    | 0.0     | 1.0           | 0.2           | 2.7           | 0.5    | 0.1    | 0.7    |
| Bakersfield, CA                             | 20.3                               | 0.2    | 3.2  | 0.4    | 0.1     | 0.2           | 0.2           | 2.8           | 0.2    | 0.1    | 0.2    |
| Bridgeport-Stamford-Norwalk, CT             | 20.8                               | 0.6    | 3.9  | 4.9    | 0.1     | 4.3           | 0.4           | 2.8           | 0.7    | 0.2    | 0.2    |
| Cincinnati, OH-KY-IN                        | 4.1                                | 0.5    | 1.7  | 0.8    | 0.0     | 0.2           | 0.1           | 1.2           | 0.3    | 0.1    | 0.1    |
| Detroit-Warren-Dearborn, MI                 | 9.1                                | 0.3    | 4.7  | 2.2    | 0.0     | 0.2           | 0.6           | 4.0           | 0.4    | 0.1    | 0.2    |
| Fresno, CA                                  | 21.9                               | 0.2    | 5.7  | 0.7    | 0.1     | 0.2           | 0.2           | 5.2           | 0.3    | 0.1    | 0.2    |
| Hartford-West Hartford-East Hartford, CT    | 12.5                               | 0.6    | 3.2  | 3.9    | 0.0     | 1.3           | 0.6           | 2.4           | 0.5    | 0.0    | 0.2    |
| Lexington-Fayette, KY                       | 7.3                                | 0.7    | 2.4  | 0.8    | 0.0     | 0.2           | 0.2           | 1.3           | 0.7    | 0.2    | 0.1    |
| Los Angeles-Long Beach-Anaheim, CA          | 34.8                               | 0.6    | 13.1 | 1.7    | 0.1     | 0.9           | 0.3           | 8.3           | 2.6    | 0.4    | 1.7    |
| Louisville/Jefferson County, KY-IN          | 4.9                                | 0.6    | 1.5  | 0.7    | 0.0     | 0.2           | 0.1           | 1.2           | 0.2    | 0.0    | 0.1    |
| Modesto, CA                                 | 20.7                               | 0.1    | 4.7  | 1.2    | 0.3     | 0.3           | 0.2           | 4.2           | 0.3    | 0.0    | 0.1    |
| New Haven-Milford, CT                       | 11.7                               | 0.7    | 3.0  | 3.2    | 0.0     | 1.6           | 0.4           | 2.0           | 0.7    | 0.1    | 0.2    |
| New Orleans-Metairie, LA                    | 7.1                                | 0.2    | 2.1  | 0.6    | 0.0     | 0.4           | 0.1           | 1.7           | 0.3    | 0.0    | 0.1    |
| New York-Newark-Jersey City, NY-NJ-PA       | 28.4                               | 1.2    | 8.0  | 4.7    | 0.1     | 4.3           | 0.2           | 4.6           | 2.4    | 0.2    | 0.8    |
| Ogden-Clearfield, UT                        | 6.1                                | 0.1    | 1.0  | 0.7    | 0.1     | 0.5           | 0.2           | 0.6           | 0.2    | 0.1    | 0.1    |
| Omaha-Council Bluffs, NE-IA                 | 6.8                                | 0.6    | 1.9  | 0.6    | 0.0     | 0.1           | 0.1           | 1.5           | 0.2    | 0.1    | 0.2    |
| Oxnard-Thousand Oaks-Ventura, CA            | 22.8                               | 0.2    | 5.3  | 1.7    | 0.1     | 0.6           | 0.4           | 4.0           | 0.8    | 0.2    | 0.3    |
| Philadelphia-Camden-Wilmington, PA-NJ-DE-MD | 9.8                                | 0.9    | 3.9  | 2.0    | 0.0     | 0.5           | 0.2           | 2.7           | 0.8    | 0.0    | 0.4    |
| Provo-Orem, UT                              | 7.5                                | 0.1    | 1.2  | 0.5    | 0.3     | 1.3           | 0.4           | 0.6           | 0.3    | 0.1    | 0.2    |
| Riverside-San Bernardino-Ontario, CA        | 22.0                               | 0.4    | 4.6  | 0.9    | 0.1     | 0.5           | 0.4           | 3.4           | 0.7    | 0.1    | 0.4    |
| Sacramento--Roseville--Arden-Arcade, CA     | 18.0                               | 0.4    | 7.9  | 2.8    | 0.6     | 0.3           | 0.3           | 6.1           | 1.3    | 0.2    | 0.4    |
| Salt Lake City, UT                          | 12.3                               | 0.5    | 2.7  | 1.4    | 0.5     | 1.1           | 0.3           | 2.0           | 0.4    | 0.1    | 0.2    |
| San Diego-Carlsbad, CA                      | 23.7                               | 0.5    | 8.6  | 1.9    | 0.1     | 0.5           | 0.4           | 6.8           | 1.0    | 0.3    | 0.5    |
| San Francisco-Oakland-Hayward, CA           | 30.7                               | 0.6    | 16.6 | 3.0    | 0.5     | 0.9           | 0.5           | 9.6           | 6.0    | 0.4    | 0.7    |
| San Jose-Sunnyvale-Santa Clara, CA          | 38.0                               | 0.6    | 23.5 | 3.0    | 0.2     | 0.6           | 0.5           | 16.3          | 5.4    | 0.6    | 1.2    |
| Santa Rosa, CA                              | 16.7                               | 0.4    | 2.9  | 1.9    | 0.2     | 0.3           | 0.4           | 2.0           | 0.5    | 0.1    | 0.2    |
| Seattle-Tacoma-Bellevue, WA                 | 17.3                               | 1.2    | 8.6  | 2.8    | 0.3     | 0.4           | 0.8           | 5.5           | 1.7    | 0.4    | 1.1    |
| Stockton-Lodi, CA                           | 23.6                               | 0.3    | 9.0  | 0.9    | 0.2     | 0.3           | 0.2           | 8.0           | 0.7    | 0.1    | 0.2    |
| Urban Honolulu, HI                          | 19.8                               | 0.1    | 16.2 | 0.7    | 1.9     | 0.3           | 0.2           | 10.1          | 2.5    | 2.1    | 1.6    |
| Worcester, MA-CT                            | 10.0                               | 1.2    | 3.1  | 2.0    | 0.0     | 1.5           | 0.5           | 2.4           | 0.5    | 0.0    | 0.1    |

\*For supplemental analysis of Asia-specific regions

MSA, metropolitan statistical area

Note: where sums do not equal total, persons were specified as foreign born, without further details

**Supplementary Table 2** Results of an age-standardized generalized linear model of all gastric adenocarcinomas

| Geographic area              | Coefficient | P-value |
|------------------------------|-------------|---------|
| Per percent foreign born in: |             |         |
| Africa                       | -3.19       | 0.28    |
| Central America              | 0.25        | 0.12    |
| South America                | 1.53        | 0.39    |
| North America                | 233.30      | 0.43    |
| Caribbean                    | -2.48       | 0.14    |
| Northern Europe              | 3.07        | 0.80    |
| Western Europe               | -7.67       | 0.61    |
| Eastern Europe               | 3.50        | 0.06    |
| Eastern Asia                 | 0.36        | 0.65    |
| South Central Asia           | -0.96       | 0.27    |
| South Eastern Asia           | 0.64        | 0.27    |
| Western Asia                 | 0.32        | 0.86    |

Coefficients are per 100,000

**Supplementary Table 3** Results of an age-standardized generalized linear model of cardia adenocarcinomas, evaluating Asian-born populations

| Geographic area                      | Coefficient | P-value |
|--------------------------------------|-------------|---------|
| Per percent individuals of:          |             |         |
| Asia (excluding China, Japan, Korea) | 43.09       | 0.06    |
| China                                | -0.27       | 0.30    |
| Japan                                | 0.35        | 0.65    |
| Korea                                | 0.32        | 0.68    |

Coefficients are per 100,000

**Supplementary Table 4** Results of an age-standardized generalized linear model of all gastric adenocarcinomas, evaluating Asian born populations

| Geographic area                      | Coefficient | P-value |
|--------------------------------------|-------------|---------|
| Per percent individuals of:          |             |         |
| Asia (excluding China, Japan, Korea) | 167.64      | 0.02    |
| China                                | -1.04       | 0.19    |
| Japan                                | 3.92        | 0.11    |
| Korea                                | 2.51        | 0.30    |

Coefficients are per 100,000

**Supplementary Table 5** Results of an age-standardized generalized linear model of all foreign-born individuals

| Cancer classification | Coefficient | P-value |
|-----------------------|-------------|---------|
| Non-cardia            | 0.13        | <0.001  |
| Cardia                | 0.04        | 0.11    |
| All                   | 0.22        | <0.001  |

Coefficients are per 100,000 cases

**Supplementary Table 6** Age standardized incidence rates per 100,000 persons by metropolitan statistical area (MSA)

| MSA                                         | Non-cardia | Cardia | Not otherwise specified |
|---------------------------------------------|------------|--------|-------------------------|
| Albuquerque, NM                             | 4.14       | 2.28   | 3.35                    |
| Allentown-Bethlehem-Easton, PA-NJ           | 0.51       | 0.42   | 0.38                    |
| Atlanta-Sandy Springs-Roswell, GA           | 4.81       | 2.65   | 2.87                    |
| Bakersfield, CA                             | 4.31       | 2.44   | 3.24                    |
| Bridgeport-Stamford-Norwalk, CT             | 6.31       | 3.57   | 3.25                    |
| Cincinnati, OH-KY-IN                        | 0.54       | 0.72   | 0.44                    |
| Detroit-Warren-Dearborn, MI                 | 4.68       | 3.44   | 2.5                     |
| Fresno, CA                                  | 5.1        | 3.04   | 3                       |
| Hartford-West Hartford-East Hartford, CT    | 5.33       | 4.29   | 2.55                    |
| Lexington-Fayette, KY                       | 3.69       | 2.96   | 1.99                    |
| Los Angeles-Long Beach-Anaheim, CA          | 7.54       | 2.8    | 3.46                    |
| Louisville/Jefferson County, KY-IN          | 3.07       | 2.89   | 1.75                    |
| Modesto, CA                                 | 3.98       | 3.6    | 2.31                    |
| New Haven-Milford, CT                       | 4.6        | 4.6    | 3.12                    |
| New Orleans-Metairie, LA                    | 5.66       | 3.2    | 3.08                    |
| New York-Newark-Jersey City, NY-NJ-PA       | 1.85       | 1.16   | 1.25                    |
| Ogden-Clearfield, UT                        | 2.52       | 2.11   | 1.96                    |
| Omaha-Council Bluffs, NE-IA                 | 0.47       | 0.72   | 0.28                    |
| Oxnard-Thousand Oaks-Ventura, CA            | 4.73       | 3.02   | 2.03                    |
| Philadelphia-Camden-Wilmington, PA-NJ-DE-MD | 1.03       | 0.83   | 0.69                    |
| Provo-Orem, UT                              | 2.27       | 1.82   | 1.45                    |
| Riverside-San Bernardino-Ontario, CA        | 4.65       | 2.77   | 2.76                    |
| Sacramento--Roseville--Arden-Arcade, CA     | 4.36       | 3.29   | 2.22                    |
| Salt Lake City, UT                          | 2.88       | 2.41   | 2.28                    |
| San Diego-Carlsbad, CA                      | 4.15       | 2.88   | 2.43                    |
| San Francisco-Oakland-Hayward, CA           | 6.02       | 2.92   | 2.69                    |
| San Jose-Sunnyvale-Santa Clara, CA          | 6.27       | 3.04   | 2.71                    |
| Santa Rosa, CA                              | 3.89       | 3.59   | 1.91                    |
| Seattle-Tacoma-Bellevue, WA                 | 3.63       | 3.81   | 2.52                    |
| Stockton-Lodi, CA                           | 4.63       | 3.4    | 3.63                    |
| Urban Honolulu, HI                          | 8.33       | 2.38   | 4.08                    |
| Worcester, MA-CT                            | 0.37       | 0.75   | 0.24                    |
